# Supplementary material for: Surface Engineering of Regenerated Cellulose Nanocomposite Films with High Strength, Ultraviolet Resistance, and a Hydrophobic Surface
Source: MDPI journal article supplement (doi:10.3390/polym15061427), 2023-03-14
Supplement: s1 [file s1]

## **Supplementary Material**

### **Surface Engineering of Regenerated Cellulose Nanocomposite Films with High Strength, Ultraviolet Resistance, and a Hydrophobic Surface**

Ying Zhu, Tianhao Wang, Yanan Dai, Ye Wang, Yukun Ding, Liping Zhang<sup>\*</sup>

Department of Chemistry and Chemical Engineering, MOE Engineering Research  
Center of Forestry Biomass Materials and Bioenergy, Beijing Forestry University,  
Beijing 100083, China.

#### **\*Corresponding Authors**

Liping Zhang - Department of Chemistry and Chemical Engineering, Beijing Forestry  
University, Beijing, 100083, China; Email: zhanglp418@163.com; Tel/Fax: 010-  
62338152

## Mechanical Properties of RC films and HRC films

**Table S1.** The results of tensile tests of RC films and HRC films.

| Sample | Thickness<br>( $\mu\text{m}$ ) | Tensile<br>Stress<br>(N) | Tensile<br>Strength<br>(MPa) | Tensile<br>Strain at<br>Fracture<br>(%) | Gram<br>Weight<br>( $\text{g/m}^2$ ) |
|--------|--------------------------------|--------------------------|------------------------------|-----------------------------------------|--------------------------------------|
| RC0    | 32 $\pm$ 0.82                  | 26.25 $\pm$ 0.41         | 54.69 $\pm$ 0.41             | 6 $\pm$ 0.77                            | 40.69                                |
| RC2    | 29 $\pm$ 0.82                  | 28.08 $\pm$ 0.36         | 64.55 $\pm$ 0.36             | 10 $\pm$ 0.22                           | 38.26                                |
| RC4    | 29 $\pm$ 0.5                   | 29.40 $\pm$ 0.58         | 67.59 $\pm$ 0.58             | 9 $\pm$ 0.72                            | 37.97                                |
| RC6    | 30 $\pm$ 0.5                   | 33.81 $\pm$ 0.27         | 77.22 $\pm$ 0.27             | 14 $\pm$ 0.9                            | 39.45                                |
| RC8    | 29 $\pm$ 0.47                  | 28.12 $\pm$ 0.28         | 64.64 $\pm$ 0.28             | 6 $\pm$ 0.22                            | 38.10                                |
| RC10   | 30 $\pm$ 0.83                  | 18.690 $\pm$ 0.14        | 41.53 $\pm$ 0.14             | 3 $\pm$ 0.69                            | 40.34                                |
| HRC0.5 | 30.25 $\pm$ 0.88               | 29.74 $\pm$ 0.48         | 65.54 $\pm$ 0.61             | 9 $\pm$ 0.21                            | 40.87                                |
| HRC1   | 31.5 $\pm$ 0.71                | 31.26 $\pm$ 0.77         | 66.16 $\pm$ 0.53             | 6 $\pm$ 0.59                            | 42.28                                |
| HRC1.5 | 30.25 $\pm$ 0.71               | 30.48 $\pm$ 0.5          | 67.17 $\pm$ 0.56             | 6 $\pm$ 0.09                            | 40.29                                |
| HRC2   | 30 $\pm$ 0.35                  | 32.66 $\pm$ 0.77         | 72.58 $\pm$ 0.63             | 7 $\pm$ 0.37                            | 39.93                                |
| HRC2.5 | 30.75 $\pm$ 0.11               | 34.09 $\pm$ 0.19         | 73.91 $\pm$ 0.58             | 6 $\pm$ 0.84                            | 41.125                               |
| HRC3   | 30.5 $\pm$ 0.35                | 27.9 $\pm$ 0.24          | 60.98 $\pm$ 0.26             | 4 $\pm$ 0.99                            | 41.29                                |

## Rheological properties of composite film liquid

**Table S2.** The zero-shear rate viscosity of composite film liquid with different addition of nano-SiO<sub>2</sub> at 25 °C.

| Sample | $\eta_0$ (Pa·s) |
|--------|-----------------|
| RC0    | 252.8           |
| RC2    | 283             |
| RC4    | 324.2           |
| RC6    | 339.9           |
| RC8    | 258.2           |

## Biodegradable behaviors of the RC0

**Table S3.** Weight loss rate of the RC0 in soil.

| Time (d)                | 0 | 3     | 6     | 9     | 12    | 15  |
|-------------------------|---|-------|-------|-------|-------|-----|
| Weight loss rate<br>(%) | 0 | 10.95 | 18.57 | 23.10 | 45.71 | 100 |

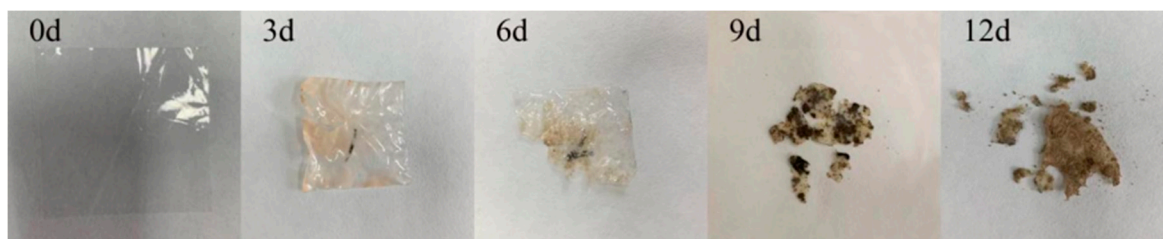

**Figure S3.** Changes of the RC0 during soil degradation.

From the perspective of environmental protection, biodegradability is the basic requirement of packaging materials.[1] As shown in Figure S3, RC0 became some cracks after burying in soil for 3 days. The fragmentation process of RC0 during its biodegradation in soil could be found in Figure S3. This phenomenon can be explained by the fact that the film was attacked and digested by the microorganisms in the soil. Furthermore, some fungal mycelia began to appear on the surface after 3 days of degradation, and a large number of fungal mycelia appeared on the film after 6 days. The microorganisms and broken fragments of RC0 were observed after 9 days. Table S2 shows the course of weight loss against degradation time for the RC0 film buried in the soil. From the extrapolation of the plots, RC0 could be biodegraded completely by the microorganisms in the soil at 32 °C after 15 days. Compared to the commercial plastics, these regenerated cellulose films were safe and biodegradable after being used.

## References:

- [1] K. Zhu, H. Tu, P. Yang, C. Qiu, D. Zhang, A. Lu, L. Luo, F. Chen, X. Liu, L. Chen, Mechanically Strong Chitin Fibers with Nanofibril Structure, Biocompatibility and Biodegradability, CHEM MATER (2019).
